# Presynaptic accumulation of $\alpha$ -synuclein causes synaptopathy and progressive neurodegeneration

Jessika C. Bridi<sup>1#\*</sup>, Erika Berezki<sup>4</sup>, Saffron K. Smith<sup>5</sup>, Gonalo M. Poas<sup>3,6</sup>, Benjamin Kottler<sup>1</sup>, Pedro M. Domingos<sup>3</sup>, Christopher J. Elliott<sup>5</sup>, Dag Aarsland<sup>2,4</sup>, Frank Hirth<sup>1\*</sup>

<sup>1</sup> King's College London, Institute of Psychiatry, Psychology & Neuroscience, Maurice Wohl Clinical Neuroscience Institute, Department of Basic & Clinical Neuroscience; London, UK

<sup>2</sup> Department of Old Age Psychiatry, Institute of Psychiatry Psychology and Neuroscience, King's College London, London, UK

<sup>3</sup> Instituto de Tecnologia Qumica e Biolgica Antnio Xavier, Universidade Nova de Lisboa (ITQB NOVA), Oeiras, Lisbon, Portugal

<sup>4</sup> Department of Neurobiology, Care Sciences and Society, Center for Alzheimer Research, Division of Neurogeriatrics, Karolinska Institutet, Novum, Stockholm, Sweden

<sup>5</sup> Department of Biology and York Biomedical Research Institute, University of York, York, YO1 5DD, UK

<sup>6</sup> School of Biological Sciences, Monash University, Melbourne, Victoria, Australia

# Current address: Laboratory of Molecular and Functional Neurobiology, Department of Pharmacology, Institute of Biomedical Sciences, University of So Paulo, So Paulo, Brazil

\*Correspondence to:

Dr. Jessika Bridi; email: [jessikabridi@usp.br](mailto:jessikabridi@usp.br)

Dr. Frank Hirth; email: [Frank.Hirth@kcl.ac.uk](mailto:Frank.Hirth@kcl.ac.uk)

## Abstract

Alpha-synuclein ( $\alpha$ -syn) mislocalisation and accumulation in intracellular inclusions is the major pathological hallmark of degenerative synucleinopathies, including Parkinson's disease, Parkinson's disease with Dementia and Dementia with Lewy Bodies. Typical symptoms are behavioural abnormalities including motor deficits that mark disease progression, while non-motor symptoms and synaptic deficits are already apparent during the early stages of disease. Synucleinopathies have therefore been considered synaptopathies that exhibit synaptic dysfunction prior to neurodegeneration. However, the mechanisms and events underlying synaptopathy are largely unknown. Here we investigated the cascade of pathological events underlying  $\alpha$ -syn accumulation and toxicity in a *Drosophila* model of synucleinopathy by employing a combination of histological, biochemical, behavioural and electrophysiological assays. Our findings demonstrate that targeted expression of human  $\alpha$ -syn leads to its accumulation in presynaptic terminals that caused downregulation of synaptic proteins, Cysteine String Protein, Synapsin, and Syntaxin 1A, and a reduction in the number of Bruchpilot puncta, the core component of the presynaptic active zone essential for its structural integrity and function. These  $\alpha$ -syn-mediated presynaptic alterations resulted in impaired neuronal function, which triggered behavioural deficits in ageing *Drosophila* that occurred prior to progressive degeneration of dopaminergic neurons. Comparable alterations in presynaptic active zone protein were found in patient brain samples of Dementia with Lewy Bodies. Together, these findings demonstrate that presynaptic accumulation of  $\alpha$ -syn impairs the active zone and neuronal function, which together cause synaptopathy that results in behavioural deficits and the progressive loss of dopaminergic neurons. This sequence of events resembles the cytological and behavioural phenotypes that characterise the onset and progression of synucleinopathies, suggesting that  $\alpha$ -syn mediated synaptopathy is an initiating cause of age-related neurodegeneration.

59

60 **Keywords:** Parkinson's disease; Parkinson's disease with Dementia; Dementia with Lewy  
61 Bodies;  $\alpha$ -synuclein; synapse; active zone; synaptopathy; neurodegeneration; *Drosophila*.

62

63 **Abbreviations:** active zone (AZ); CSP (Cysteine String Protein); DA (dopaminergic);  
64 *Drosophila* Arousal Tracking system (DART); DLB (Dementia with Lewy bodies); instant  
65 structured illumination microscopy (iSIM); neuromuscular junction (NMJ); PD (Parkinson's  
66 disease); PDD (Parkinson's disease Dementia); proboscis extension response (PER); startled-  
67 induced negative geotaxis (SING);  $\alpha$ -syn ( $\alpha$ -synuclein).

68

69 **Running title:**  $\alpha$ -syn accumulation triggers synaptopathy.

70

## Introduction

Synucleinopathies are characterised by intraneuronal inclusions called Lewy bodies (LB) that are mainly formed of misfolded and aggregated forms of the presynaptic protein  $\alpha$ -synuclein ( $\alpha$ -syn) (Spillantini *et al.*, 1997; Bendor *et al.*, 2013; Walker *et al.*, 2015; Goedert *et al.*, 2017). These include Dementia with Lewy bodies (DLB) as well as and Parkinson's disease with Dementia (PDD) and Parkinson's disease (PD). PD is mainly characterised by the progressive loss of dopaminergic (DA) neurons in the substantia nigra pars compacta (SN), thereby depleting dopamine levels in synaptic terminals of the dorsal striatum (Dauer and Przedborski, 2003; Cheng *et al.*, 2010; Bridi and Hirth, 2018). The resulting regulatory imbalance in the basal ganglia causes a range of behavioural symptoms including bradykinesia, uncontrollable tremor at rest, postural impairment, and rigidity (Lang and Lozano, 1998*a, b*; Mochizuki *et al.*, 2018).

Although the majority of PD cases are sporadic, several genes including *LRRK2*, *Parkin*, *PINK1*, *DJ-1*, *GBA* and *SNCA* contribute to heritable cases of the disease (Klein and Westenberger, 2012; Ferreira and Massano, 2017). However, among the PD-related genes identified, the *SNCA* gene encoding  $\alpha$ -syn remains the most potent culprit underlying PD, with a key pathogenic role both in familial and sporadic cases (Satake *et al.*, 2009; Simón-Sánchez *et al.*, 2009). Several point mutations in *SNCA* and increased gene dosage caused by duplication or triplication of the gene locus, are causally related to severe forms of PD (Singleton *et al.*, 2003; Kalia and Lang, 2015). These findings suggest a causal relationship between  $\alpha$ -syn levels and the severity of cognitive decline, motor and non-motor symptoms, and neurodegeneration (Venda *et al.*, 2010; Bridi and Hirth, 2018).

Although the mechanisms underlying  $\alpha$ -syn toxicity remain unclear, proteinaceous inclusions enriched with  $\alpha$ -syn were found not only in LB within the neuronal soma but also in axonal processes (Braak *et al.*, 1999). Most importantly,  $\alpha$ -syn micro-aggregates were found to be enriched in the presynaptic terminals of DLB patients (Kramer and Schulz-Schaeffer, 2007) along with phosphorylated  $\alpha$ -syn, which is believed to disrupt synaptic structure and function (Colom-Cadena *et al.*, 2017). These findings suggest that  $\alpha$ -syn accumulation may cause a toxic gain of function phenotype at the synapse, which impairs its function and connectivity, ultimately causing synaptopathy.

In line with this hypothesis, classical motor symptoms in PD become clinically apparent only when 60% of DA striatal terminals were already lost, while the loss of DA neurons in the SN is only around 30% (Burke and O'Malley, 2013). Corroborating these observation, it is well acknowledged that the onset of PD initiates at least 20 years prior to the detection of classical motor phenotypes, a period known as the prodromal phase (Hawkes *et al.*, 2010; Kalia and Lang, 2015; Mhlknecht *et al.*, 2015). It has been suggested that during this phase, a large number of proteins involved in synaptic transmission are affected, as indicated by their altered expression levels in PD and DLB patients (Bereczki *et al.*, 2016; Dijkstra *et al.*, 2015). These findings are in agreement with positron emission tomography of early-stage PD patients who presented extensive axonal damage and diminished nigrostriatal pathway connectivity (Caminiti *et al.*, 2017). Therefore, it has been hypothesised that neurodegeneration in PD and DLB follows a dying back-like pathomechanism, where degeneration of synapses and axonal connections precedes the loss of neurons, classifying them as synaptopathies (Calo *et al.*, 2016; Bridi and Hirth, 2018). However, it remains unclear how  $\alpha$ -syn accumulation impairs synaptic homeostasis, its structure and function, ultimately leading to neurodegeneration.

Here we investigated the succession of events caused by cell and tissue-specific accumulation of  $\alpha$ -syn. We employed a *Drosophila* model of synucleinopathy that expresses human wild type  $\alpha$ -syn, and analysed post-mortem tissue of PD and DLB patients. Our findings demonstrate that  $\alpha$ -syn accumulates in, and alters the presynaptic terminal, especially the active zone, which was also observed in the prefrontal cortex of DLB patients. In *Drosophila*, these alterations caused neuronal dysfunction and behavioural deficits that preceded degenerative loss of DA neurons - cytological and behavioural phenotypes that resemble the onset and progression of synucleinopathies. Together these findings provide experimental evidence that presynaptic accumulation of  $\alpha$ -syn causes synaptopathy and progressive neurodegeneration.

## Results

### $\alpha$ -syn accumulates in presynaptic terminals

To investigate the consequences of  $\alpha$ -syn accumulation on synapse structure and function, we used transgenic *Drosophila* to express human wild type  $\alpha$ -syn fused to EGFP (*UAS-WT- $\alpha$ -syn-EGFP*) alongside with control animals expressing EGFP only (*UAS-EGFP*) (Poças *et al.*, 2015). This genetic model is an invaluable tool to investigate the toxic gain-of-function of  $\alpha$ -syn as the *Drosophila* genome lacks a homologue of the *SNCA* gene (Feany and Bender, 2000). We first compared the expression pattern of  $\alpha$ -syn to the respective EGFP control by using the pan-neuronal driver *nSyb-Gal4*. Using immunohistochemistry, the localisation and expression pattern of  $\alpha$ -syn were determined at the *Drosophila* L3 larval neuromuscular junction (NMJ) by colocalisation with Cysteine String Protein (CSP) and horseradish peroxidase (HRP) (Fig. 1A-B). CSP labels boutons containing synaptic vesicles at the presynaptic terminal (Fernández-Chacón *et al.*, 2004; Burgoyne and Morgan, 2015) while

HRP labels synaptic membranes (Menon *et al.*, 2013) (Fig. 1A). The control expressing EGFP only and the experimental group expressing  $\alpha$ -syn-EGFP displayed co-localisation with CSP (Fig. 1B). In addition, EGFP and  $\alpha$ -syn were also detectable in axonal domains labelled with anti-HRP and devoid of synaptic boutons, however, the EGFP expression pattern in these areas was very distinct between control and experimental group (Fig. 1B-C, arrowheads and dashed boxes).  $\alpha$ -syn immunolabelling was enriched in regions with a high density of synaptic boutons. In order to quantify this phenotype, EGFP intensity was measured in regions of CSP-positive synaptic boutons, and in CSP-negative axonal regions, in both control and experimental conditions. A ratio of EGFP intensity was calculated by dividing the values obtained from synaptic boutons by values obtained from axonal regions. Values around 1 indicated that EGFP intensity is similar in the two regions while values higher than 1 identified a higher EGFP intensity in synaptic boutons compared to axonal regions. The analysis revealed that  $\alpha$ -syn immunofluorescence was significantly higher in synaptic boutons than in axons compared to the control NMJ expressing EGFP only (Fig. 1B-C and Table S1, arrowheads and dashed boxes). These data suggest that  $\alpha$ -syn accumulates predominantly in presynaptic terminals and to a lesser extent in axonal areas devoid of synaptic boutons in the NMJ.

### **Accumulation of $\alpha$ -syn affects presynaptic proteins**

Previous studies demonstrated that the levels of synaptic proteins are altered in patients with PD and related disorders (Dijkstra *et al.*, 2015; Bereczki *et al.*, 2016), however, it is unclear whether and how  $\alpha$ -syn accumulation might be related to the disease. We, therefore, investigated whether presynaptic accumulation of  $\alpha$ -syn leads to alterations in the expression and/or localisation of presynaptic proteins that are essential for neurotransmission. We first used the larval L3 NMJ to evaluate the effect of  $\alpha$ -syn accumulation on synaptic vesicle

proteins CSP and Synapsin, the SNARE complex proteins, SNAP-25 and Synaptobrevin, and the synaptic vesicle-specific  $\text{Ca}^{2+}$  binding protein Synaptotagmin.

CSP is a synaptic vesicle protein whose loss-of-function in *Drosophila* causes synaptic degeneration and lethality (Zinsmaier *et al.*, 1990, 1994). CSP acts as a chaperone in the presynaptic terminal (Burré *et al.*, 2010; Sharma *et al.*, 2011) and has been shown to be altered in PD patients as well as in cellular models inoculated with pre-formed fibrils of  $\alpha$ -syn (Volpicelli-Daley *et al.*, 2011; Dijkstra *et al.*, 2015). We measured the expression levels and localisation of CSP at the larval NMJ by immunofluorescence, which revealed that CSP levels but not its localisation were downregulated in synaptic boutons co-labelled with  $\alpha$ -syn when compared to EGFP controls (Fig. 2A). Quantification of mean fluorescence intensity was performed as a proxy for expression level in single synaptic boutons revealed significantly reduced CSP levels in larvae expressing  $\alpha$ -Syn compared to controls expressing EGFP only (Fig. 2C and Table S1).

We next examined the presynaptic protein Synapsin which is associated with the cytoplasmic surface of the synaptic vesicle membrane and plays a fundamental role in regulating vesicle trafficking (Greengard *et al.*, 1993; Gitler *et al.*, 2004; Südhof, 2004). We measured Synapsin fluorescence intensity and localisation in single synaptic boutons of larvae expressing either EGFP as control or  $\alpha$ -syn (Fig. 2B). Quantitative analysis of Synapsin fluorescence intensity revealed that  $\alpha$ -syn accumulation caused a reduction in Synapsin expression levels in synaptic boutons, compared to the control group (Fig. 2D and Table S1); however, alterations in Synapsin localisation were not observed. In contrast to CSP and Synapsin, we did not observe any changes in fluorescence intensity levels and localisation of SNAP-25, Synaptobrevin or Synaptotagmin (Fig. S1).



To examine the progression of  $\alpha$ -syn-mediated presynaptic deficits, we assessed  $\alpha$ -syn accumulation in adult flies at day 3 and 20 and performed western blots of heads of flies expressing  $\alpha$ -syn or EGFP. While the levels of EGFP were unchanged ( $p=0.5777$ ; Fig. 3A and Table S1), elevated levels of  $\alpha$ -syn were increased over time ( $*p=0.0411$ ; Fig. 3A and Table S1). We then assessed the levels of Synapsin and Syntaxin in adult flies, which revealed downregulated Synapsin levels at day 3 and day 20 (3-DO:  $*p=0.0328$ ; 20-DO:  $**p=0.002$ ; Fig. 3B and Table S1), similar to the phenotype observed in synaptic boutons of the NMJ. The expression levels of Syntaxin, a component of the SNARE complex (Han *et al.*, 2017), were reduced at day 3 but only significantly downregulated at day 20 when compared to control (3-DO:  $p=0.1776$ ; 20-DO:  $**p=0.0093$ ; Fig. 3C and Table S1). Together, these findings indicate that  $\alpha$ -syn accumulates in the *Drosophila* brain, which in turn causes specific alterations of presynaptic proteins, with CSP, Syntaxin and Synapsin being especially susceptible to the deleterious effects of accumulating  $\alpha$ -syn.

### **Presynaptic accumulation of $\alpha$ -syn reduces active zone density**

Given the impact of  $\alpha$ -syn on presynaptic proteins, we investigated whether the accumulation of  $\alpha$ -syn may alter the active zone (AZ) in *Drosophila*. The AZ is a specialised presynaptic site required for vesicle docking and neurotransmitter exocytosis, conveying speed and accuracy to synaptic transmission (Zhai and Bellen, 2004; Südhof, 2012; Wang *et al.*, 2016). We used confocal and instant structured illumination microscopy (iSIM) to NMJs labelled with anti-Bruchpilot (BRP) (Fig. 4A-B). BRP encodes a cytoskeletal protein essential for the structural integrity and the function of electron-dense projection (T-bar) at the AZ (Kittel *et al.*, 2006; Wagh *et al.*, 2006).

Expression and accumulation of  $\alpha$ -syn in *nSyb>WT- $\alpha$ -syn-EGFP* L3 larvae caused a reduction in the total number of BRP-labelled AZ puncta compared to control groups *nSyb/+* and *nSyb>EGFP* (vs. *nSyb/+*  $*p=0.0245$ ; vs. *nSyb>EGFP*  $*p=0.0317$ ; Fig. 4C and Table S1). A detailed analysis accounting also for the surface area of the NMJ labelled by anti-HRP (Goel and Dickman, 2018), revealed a more significant reduction in the total number of puncta in *nSyb>WT- $\alpha$ -syn-EGFP* larvae, when compared to controls (vs. *nSyb/+* and *nSyb>EGFP*  $**p=0.0023$ ; Fig. 4D and Table S1). In contrast, neither the total number of synaptic boutons (vs. *nSyb>EGFP*  $p=0.3037$ ; Fig. 4E and Table S1) nor the morphology and localisation of BRP puncta (Fig. 4B – dashed lines) were affected. Together these data demonstrate that accumulation of  $\alpha$ -syn alters the AZ of presynaptic terminals.

### **$\alpha$ -syn accumulation impairs neuronal function**

The core function of BRP is the maintenance of the presynaptic AZ and thus synaptic homeostasis and function (Wagh *et al.*, 2006). The observed reduction of BRP-positive puncta suggested that physiological defects could occur as a result of presynaptic accumulation of  $\alpha$ -syn. To investigate whether synaptic efficacy and neurotransmission were affected, we determined the Steady State Visual Evoked Potential (SSVEP) in adult flies (Fig. 5). The SSVEP quantifies the physiological response to flickering stimuli which generate frequency- and phase-locked response components with a very high signal-to-noise ratio (Fig. 5A-C) (Afsari *et al.*, 2014; Petridi *et al.*, 2020). In *Drosophila*, the net response of flickering stimuli is mediated by retinal photoreceptor cells together with lamina and medulla neurons that are electrically linked (Fig. 5C-D) (Heisenberg, 1971). The visual response negatively correlates with dopamine levels in the brain (Calcagno *et al.*, 2013), with dopamine required to inhibit the response to visual stimuli (Afsari *et al.*, 2014).

Our analysis revealed that lamina neurons in 3-day-old *TH>WT-α-syn-EGFP* flies showed an increased SSVEP response upon stimulation when compared to control groups (*vs. TH/+* \**p*=0.0313; *vs. TH>EGFP* \**p*=0.0325; Fig. 5E and Table S1). This response was specific to lamina neurons, as photoreceptor cells showed no alteration in their SSVEP response (*vs. TH/+* *p*=0.9998; *vs. TH>EGFP* *p*=0.8261; Fig. 5F and Table S1). The difference in stimuli response between the lamina and photoreceptor neurons correlated well with the far more extensive DA innervation in the lamina than the photoreceptor layer (Fig. 5D) (Afsari *et al.*, 2014; Petridi *et al.*, 2020). Because dopamine inhibits the SSVEP response (Afsari *et al.*, 2014), these data suggest that *TH-Gal4* driven accumulation of α-syn in DA neurons impaired synaptic output of DA-rich lamina neurons, thereby reducing their visual response inhibition which in turn resulted in an increased SSVEP response.

### **Accumulation of α-syn progressively impairs motor behaviour**

PD patients suffer from a variety of motor symptoms ranging from resting tremor to bradykinesia and akinesia, related to the reduction of striatal dopamine (Mazzoni *et al.*, 2012). However, these symptoms only become clinically apparent when a large proportion of DA neurons have already been lost (Bridi and Hirth, 2018). We, therefore, investigated whether the accumulation of α-syn and in turn the alterations in presynaptic proteins would cause any motor deficits in adult flies. We employed three independent assays to quantify voluntary and reflexive motor behaviour, the *Drosophila* Arousal Tracking system (DART) (Faville *et al.*, 2015), startled-induced negative geotaxis (SING) (White *et al.*, 2010; Ruan *et al.*, 2015) and the proboscis extension response (PER) (Cording *et al.*, 2017).

We specifically targeted α-syn to DA neurons and measured their spontaneous motor activity with DART at 3 and 20 days of age (Fig. 6A). The activity and speed of *TH>WT-α-syn-*

*EGFP* flies was greatly impaired at day 3 (Fig. 6B-C and Table S1) compared to control flies *TH-Gal4/+* and *WT- $\alpha$ -syn-EGFP/+*. Notably, both activity and speed were further reduced in flies accumulating  $\alpha$ -syn compared to controls at day 20 (Fig. 6B-C and Table S1). To better understand the detrimental impact of  $\alpha$ -syn on movement patterns, we decomposed and analysed movement as units. The first unit comprised the initiation of a motor action (Fig. 6D, red arrows), the action initiation; the second unit was the bout length, depicting for how long the flies maintain a bout of activity (Fig. 6D, dark grey boxes); and the third unit was the inter-bout interval that quantifies the duration of the pause between the end of a previous and the beginning of a new bout of activity (Fig. 6D, white boxes). These units were collectively named activity metrics.

DA-specific expression of  $\alpha$ -syn altered activity metric parameters in 3-day-old flies (Fig. 6E-G, top and Table S1). 3-day-old *TH>WT- $\alpha$ -syn-EGFP* flies revealed a reduced ability to initiate locomotor movements compared to *TH/+* controls (Fig. 6E, top). In addition, *TH>WT- $\alpha$ -syn-EGFP* flies showed a marked impairment in the capacity to maintain a motor action, thus showing shorter bouts of activity (Fig. 6F, top). In addition, these flies also displayed a longer interval between each activity bout (Fig. 6G, top). These alterations were also observed in 20-day-old *TH>WT- $\alpha$ -syn-EGFP* flies when compared to controls (Fig. 6E-G). Together these data demonstrate that expression of  $\alpha$ -syn in DA neurons caused an early onset of abnormalities that affected spontaneous motor activity, exemplified by shorter bouts of activity with reduced speed and separated by longer pauses.

To investigate the impact of  $\alpha$ -syn mediated motor impairment over an extended period of time, we utilised SING assay which probes the ability of flies to climb to the top of a tube after being gently tapped to the bottom (Miquel *et al.*, 1972; Sun *et al.*, 2018) (Fig. 6H).

Independent cohorts of flies either expressing *UAS-WT- $\alpha$ -syn-EGFP* or *UAS-EGFP* were aged and tested at 3, 10, 20, 30 and 40 days-old for their SING behaviour (Fig. 6I). *nSyb>WT- $\alpha$ -syn-EGFP* flies showed a severe reduction in their climbing ability starting at day 20 compared to both control groups (Fig. 6I and Table S1). This phenotype worsened as the flies reached 30 and 40 days of age, respectively (Fig. 6I and Table S1). These data demonstrate that accumulation of  $\alpha$ -syn and in turn alterations in presynaptic proteins lead to progressive motor deficits in ageing *Drosophila*.

To further investigate the impact of  $\alpha$ -syn expression on DA neuron function, we quantified the proboscis extension response (PER) which is modulated by a single DA neuron, the TH-VUM cell (Marella *et al.*, 2012). PER behaviour measures the proboscis extension response of flies to sugar stimuli after a short period of starvation (Fig. 6J) (Cording *et al.*, 2017). PER analysis showed the proportion of *TH>WT- $\alpha$ -syn-EGFP* flies responding to sugar stimuli was significantly lower compared to *TH/+* and *TH>EGFP* controls (Fig. 6K and Table S1). This data demonstrates that  $\alpha$ -syn impairs the neural response to sugar stimuli, most likely because the activity of TH-VUM neuron is diminished. Thus, indicating that impaired dopamine signalling causes akinetic behaviour in *Drosophila*.

### **$\alpha$ -syn induced synaptopathy causes dopaminergic neurodegeneration**

The synaptopathy hypothesis suggests that synaptic dysfunction and the resulting behavioural deficits precede degenerative cell loss. To test this hypothesis, we aged *TH>WT- $\alpha$ -syn-EGFP* and control flies and quantified DA neuron numbers in specific clusters of the ageing *Drosophila* brain that were identified by immunofluorescence with anti-tyrosine hydroxylase (TH) antibody (White *et al.*, 2010). We counted anti-TH-labelled DA neurons of PPL1 and PPL2, PPM1/2 and PPM3 clusters in the adult brain of 3, 20, and 40-day-old flies (Fig. 7A).

At 3 days of age, *TH>WT-α-syn-EGFP* flies showed no significant loss of DA neurons in the PPL1 cluster compared to the control groups (Fig. 7A'-B, Table S1). At 20-day-old, analysis of *TH>WT-α-syn-EGFP* flies revealed a significant loss of DA neurons compared to controls (Fig. 7A'-B, Table S1), which was also observed in 40-day-old flies compared to age-matched controls (Fig. 7A'-B, Table S1). Similar to PPL1, analysis of the PPM3 cluster revealed a discrete loss of DA neurons at day 20 when compared to *TH>EGFP* control and *TH/+* control at day 40 (Fig. 7C, Table S1). In contrast to PPL1 and PPM3, PPL2 and PPM1/2 clusters showed no significant alteration in the number of DA neurons over time due to WT-α-syn overexpression (Fig. 7D-E, Table S1). Together these data demonstrate that α-syn accumulation causes region-specific and progressive degeneration of dopaminergic neurons in the ageing brain of *Drosophila*.

### **Active zone protein is downregulated in human synucleinopathies**

Our findings so far indicate that presynaptic α-syn accumulation caused AZ deficits that resulted in decreased neuronal function and behavioural deficits in ageing *Drosophila* that occurred prior to progressive neurodegeneration. To evaluate the clinical significance of these *in vivo* findings, we examined whether AZ proteins were also altered in patient brain. For this, we re-analysed our previously published proteomics data that compared 32 post-mortem human brains in the prefrontal cortex of patients with PDD, DLB, PD and older adults without dementia (Berezki *et al.*, 2018). Our previous analysis identified alterations in synaptic proteins that correlated with the rate of cognitive decline and reliably discriminated PDD from Alzheimer's disease patients (Berezki *et al.*, 2018). Here we focused on proteins enriched in the mammalian presynaptic active zone, including homologs of the RIM, PICCOLO, ELKS and LIPRIN-α protein families (Table S2). Our initial analysis indicated

potential alterations in AZ protein levels in patient brain, in particular LIPRIN- $\alpha$  proteins (Table S2).

Liprin- $\alpha$ 3 and 4 proteins of the mammalian AZ play crucial roles in synapse assembly and function (Zürner and Schoch, 2009). In mammals, Liprin- $\alpha$ 3 is highly expressed in the brain while Liprin- $\alpha$ 4 has a lower abundance in the central nervous system (Zürner and Schoch, 2009). To corroborate our proteomics data, we carried out quantitative western blotting analysis of LIPRIN- $\alpha$ 3 and 4 in post-mortem tissue of prefrontal cortex (BA9), anterior cingulate cortex (BA24) and parietal cortex (BA40) in control, PDD and DLB patient brain samples. Levels of LIPRIN- $\alpha$ 3 were unaltered in all brain regions evaluated from PDD and DLB when compared to controls (Fig. 8A-C and Table S3). In contrast, expression levels of LIPRIN- $\alpha$ 4 were significantly downregulated in the prefrontal cortex of DLB patients compared to control patients (\* $p=0.0349$ ; Fig. 8B-C and Table S3). On the other hand, no significant alteration was observed in cingulate cortex ( $p=0.1192$ ) or in parietal cortex ( $p=0.8737$ ; Fig. 8B-C and Table S3).

## Discussion

$\alpha$ -syn accumulation and aggregation is the defining pathogenic feature of PD and other synucleinopathies (Goedert *et al.*, 2017; Bridi and Hirth, 2018).  $\alpha$ -syn pathology correlates with synaptic deficits and subsequent synaptopathy before neurons are lost (Hornykiewicz, 1998; Calo *et al.*, 2016; Caminiti *et al.*, 2017). However, the mechanisms and cascade of events underlying the pathogenic progression from  $\alpha$ -syn accumulation to synaptopathy and subsequent neurodegeneration are not well understood. Here we tested the hypothesis of  $\alpha$ -syn-mediated synaptopathy by expressing the human wildtype form of  $\alpha$ -syn in *Drosophila*, a well-established model to study PD and synucleinopathy (Feany and Bender, 2000; Auluck *et*



*al.*, 2002), and monitored its effect over time in the ageing animal. Our findings indicate that targeted expression of human  $\alpha$ -syn leads to its accumulation in presynaptic terminals that caused downregulation of presynaptic proteins CSP, Synapsin and Syntaxin and a reduction in the number of AZ required for synaptic transmission. In addition to synaptic alterations,  $\alpha$ -syn accumulation caused impaired neuronal function and behavioural deficits leading to the progressive loss of dopaminergic neurons in ageing flies. These data resemble key features of the onset and progression of synucleinopathies, including PD, PDD and DLB, and demonstrate that accumulating  $\alpha$ -syn can cause synaptopathy and progressive neurodegeneration. Our findings imply that one, if not the first cytotoxic insult of  $\alpha$ -syn pathology, is its accumulation in presynaptic terminals, which impairs presynaptic active zones, a phenotype we also observed in post-mortem tissue of DLB patients. The resulting impaired synaptic efficacy and diminished neuronal function affect behavioural output, which over time leads to progressive neurodegeneration.

Our findings are in line with post-mortem studies where  $\alpha$ -syn was found as small aggregates in the presynaptic terminal (Kramer and Schulz-Schaeffer, 2007; Colom-Cadena et al., 2017). Dendrites and spines of DLB patients with accumulation of aggregated  $\alpha$ -syn were significantly smaller than those without  $\alpha$ -syn and correlated with reduced expression levels of presynaptic proteins (Kramer and Schulz-Schaeffer, 2007). These findings in human patient material resemble synaptic phenotypes we observed as a result of targeted  $\alpha$ -syn accumulation in *Drosophila*; they support recent experimental findings, which indicate that aggregated  $\alpha$ -syn can directly bind and sequester presynaptic proteins (Choi *et al.*, 2018). Together with our findings, these data identify presynaptic deficits and the resultant synaptopathy as a conserved pathogenic pathway of accumulating  $\alpha$ -syn.



In addition to alterations in presynaptic proteins, we also detected  $\alpha$ -syn-mediated loss of BRP puncta in *Drosophila*. BRP is required for the structural integrity and function of synaptic AZs (Wagh *et al.*, 2006), responsible for vesicle docking and exocytosis of neurotransmitters (Zhai and Bellen, 2004; Wang *et al.*, 2016). Downregulation or mutational inactivation of BRP has been shown to impair T-bar formation and to reduce evoked synaptic transmission and quantal content (Wagh *et al.*, 2006). As a result, the neuronal function is affected, resulting in impaired behaviour, which is illustrated by the name *Bruchpilot*, meaning 'crash pilot' in German, referring to the significantly impaired manoeuvring of *BRP* mutant flies (Wagh *et al.*, 2006). Given BRPs core function, reduced numbers of BRP-positive AZs would predict reduced synaptic efficacy and impaired neural transmission in flies that accumulate  $\alpha$ -syn in presynaptic terminals. Indeed, quantification of the SSVEP (Afsari *et al.*, 2014; Petridi *et al.*, 2020) revealed altered synaptic efficacy caused by  $\alpha$ -syn accumulation in *TH>WT- $\alpha$ -syn-EGFP* flies. These observations in *Drosophila* are in line with a recent study in rodents which showed that overexpression of  $\alpha$ -syn caused impairment in the electroretinogram and loss of TH positive amacrine cells in the retina (Marrocco *et al.*, 2020).

Consistent with impaired synaptic transmission, we found that adult flies expressing  $\alpha$ -syn in DA neurons displayed behavioural deficits in spontaneous locomotor activity. 3-day-old *TH>WT- $\alpha$ -syn-EGFP* flies showed a marked reduction in activity and speed, accompanied by a significantly decreased ability to initiate and maintain motor actions, together with longer pauses between each bout of activity. These  $\alpha$ -syn-mediated motor phenotypes became more pronounced in older flies, revealing an age-related progression of the disease that has also been observed in other *Drosophila* models of PD (Feany and Bender, 2000; Whitworth *et al.*, 2005; Humphrey *et al.*, 2012; Hindle *et al.*, 2013; Poças *et al.*, 2015; Sakai *et al.*, 2019). In

addition, flies accumulating  $\alpha$ -syn also displayed akinetic behaviour which was measured by the proboscis extension response that evaluates the response to sugar stimuli, a motor behaviour that is modulated by a single dopaminergic cell, the TH-VUM neuron (Marella *et al.*, 2012). Remarkably, *TH>WT- $\alpha$ -syn-EGFP* flies showed a significant reduction in their PER response, suggesting that  $\alpha$ -syn accumulation impairs neuronal function.

This is further supported by the observed  $\alpha$ -syn-mediated alterations in the SSVEP that is regulated by DA-rich lamina neurons in the adult brain of *Drosophila* (Afsari *et al.*, 2014; Petridi *et al.*, 2020).  $\alpha$ -syn accumulation also caused progressive deficits in negative geotaxis, a startle induced locomotor behaviour that is controlled by dopamine in the fly brain (Feany and Bender, 2000; Riemensperger *et al.*, 2013; Poças *et al.*, 2015; Vaccaro *et al.*, 2017; Sun *et al.*, 2018; Sakai *et al.*, 2019). These findings demonstrate that  $\alpha$ -syn-mediated synaptic alterations and impaired neurotransmission cause motor deficits in *Drosophila* affecting voluntary behaviour including action initiation and maintenance, as well as reflex activity. Comparable phenotypes have been observed in rodent models of synucleinopathies and patients with  $\alpha$ -syn pathology (reviewed in Lashuel *et al.*, 2013; Bridi and Hirth, 2018). Together these data strongly suggest that presynaptic accumulation of  $\alpha$ -syn causes synaptopathy and progressive behavioural deficits.

Accumulation and aggregation of  $\alpha$ -syn are believed to cause a vicious cycle in dopaminergic neurons, triggering further accumulation of  $\alpha$ -syn and neuronal cell death (Bridi and Hirth, 2018). Our experiments in *Drosophila* demonstrate that accumulating  $\alpha$ -syn causes progressive degeneration of dopaminergic neurons in an age-related manner. Interestingly,  $\alpha$ -syn accumulation preferentially affected both PPL1 and PPM3 cluster of DA neurons that regulate motor behaviour and are specifically affected in *Drosophila* models of PD

(Whitworth *et al.*, 2005; Park *et al.*, 2006; Trinh *et al.*, 2008; Cunningham *et al.*, 2018). These findings resemble what is seen in PD patients where the reduction in nigrostriatal pathway connectivity occurs prior to the degenerative cell death of DA neurons in the substantia nigra pars compacta (Burke and O'Malley, 2013; Caminiti *et al.*, 2017). Of note, the progression of degenerative cell loss in *Drosophila* correlated with the progressive accumulation of  $\alpha$ -syn levels in the ageing animal, illustrating a key characteristic of synucleinopathies, especially PD, in that specific populations of dopaminergic neurons are particularly vulnerable to  $\alpha$ -syn burden which directly correlates with disease severity and extend of neurodegeneration (Braak *et al.*, 2002).

Alterations in synaptic proteins have been reported in clinical studies of PD, PDD and DLB patients with  $\alpha$ -syn pathology. These studies suggest that axonal and synaptic alterations correlate with cognitive decline and the severity of the disease (Dijkstra *et al.*, 2015; Bereczki *et al.*, 2016). *In vivo* studies showed that reduced expression of  $\alpha$ -syn was able to ameliorate neurotoxicity and behavioural deficits in conditional transgenic mice (Lim *et al.*, 2011). Furthermore, in a transgenic model of DLB/PD, pharmacological targeting of accumulating  $\alpha$ -syn was sufficient to improve behavioural alterations and to ameliorate neurodegeneration (Wrasidlo *et al.*, 2016). More recent findings indicate that the process of Lewy Body formation, rather than fibril formation of  $\alpha$ -syn, is linked to synaptic dysfunctions that occur before the early onset of neurodegeneration (Mahul-Mellier *et al.*, 2020). These findings are in line with our observations in *Drosophila*, which reveal insights into early pathogenesis whereby the presynaptic accumulation of  $\alpha$ -syn affects synaptic proteins and impairs active zone-mediated neuronal function. Consistent with our findings in *Drosophila*, we found that the AZ matrix protein Liprin- $\alpha$ 4 is downregulated in the prefrontal cortex of DLB patients which display Parkinsonian phenotypes along with dementia (Colom-Cadena *et al.*, 2017;

Bereczki *et al.*, 2018). These findings suggest a pathogenic mechanism where synaptic alterations directly correlate with cognitive decline in PD, DLB and PDD patients (Bereczki *et al.*, 2018).

Taken together, our results presented here demonstrate  $\alpha$ -syn accumulation in presynaptic terminals affects synaptic proteins and active zone integrity that impair neuronal function. The resultant synaptopathy causes behavioural deficits and progressive age-related neurodegeneration. This succession of phenotypes recapitulates key events of dying-back like neurodegeneration (Calo *et al.*, 2016; Tagliaferro and Burke, 2016; Bridi and Hirth, 2018) and provide insights into the pathogenic mechanisms underlying synaptopathy, the likely initiating event in Parkinson's disease and related synucleinopathies.

## Materials and Methods

### Fly stocks and husbandry

All fly stocks were maintained in standard cornmeal media at 25°C in a 12 h light/dark cycle, unless for ageing experiments where flies were kept in 15% yeast/sugar media (White *et al.*, 2010; Diaper *et al.*, 2013; Solomon *et al.*, 2018). Strains used were *Oregon R*, *W<sup>1118</sup>*, *nSyb-gal4* (a kind gift from Dr Sean Sweeney), *TH-gal4* (Friggi-Grelín *et al.*, 2003), *UAS-EGFP*, *UAS-WT- $\alpha$ -syn-EGFP* (Poças *et al.*, 2015)

### Immunofluorescence

*Drosophila* larval NMJ dissections were carried out according to established protocol (Brent *et al.*, 2009) and fixed either with 3.5% formaldehyde for 25 min or Bouin's fixative (Sigma) for 5 min. Primary antibodies used were anti-HRP (1:200 - Immunochemicals 123-605-021), anti-CSP (1:200 - DSHB), anti-Synapsin (1:50 - DSHB), anti-nSynaptobrevin (1:150 -

Ohyama *et al.*, 2007; a kind gift from Dr Hugo Bellen, Baylor College of Medicine), anti-Synaptotagmin (1:1000 – West *et al.*, 2015; a kind gift from Dr Sean Sweeney, University of York), anti-SNAP-25 (1:100 - Rao *et al.*, 2001; a kind gift from Dr David Deitcher, Cornell University), anti-GFP (1:500 - Thermo Fischer A6455), anti-BRP (1:50 - DSHB). Adult CNS preparations were carried out as described previously (White *et al.*, 2010). The primary antibodies used were anti-TH (1:50 - ImmunoStar), anti-GFP (1:500 - Thermo Fischer Scientific A6455). Secondary antibodies were Alexa fluor 488 and 568 (1:150; Invitrogen); for details see the Supplementary material.

### Imaging and analysis

Z-stacks of NMJ synapses innervating muscle 6/7 of segment 3 were captured with a Nikon A1R confocal or Leica TCS SP5 microscopes. The adult *Drosophila* brain images were acquired using Nikon A1R confocal for DA neuron cluster analysis. The instant super resolution structured illumination microscopy (iSIM) was performed using Nikon Eclipse Ti-E Inverted microscope to image both for adult CNS and NMJ preparations.

For the fluorescence quantification, to build up the ratio between GFP signal in the synaptic boutons and axons, the intensity of ten synaptic boutons (labelled with anti-CSP) and ten axonal regions (positive for anti-HRP and negative for anti-CSP) were quantified per NMJ. Thus, each n number represents the average value obtained from the division of fluorescence intensity of synaptic boutons/axon in each NMJ. For fluorescence quantifications of Synapsin and CSP, z-stacks were obtained using identical settings for all genotypes with same z-axis spacing between them within the same experiment and optimised for detection without saturation of the signal (Goel *et al.*, 2017). Ten synaptic boutons were analysed per NMJ

using the free hand tool from ImageJ (<http://imagej.nih.gov/ij/>), with each point in the graphs representing the average of ten synaptic boutons/NMJ.

BRP puncta number were manually counted in z-stacks using ImageJ and the Cell Counter plugin to record the total number of puncta per NMJ. Synapse surface area was calculated by creating a mask around the HRP channel, that labels the neuronal membrane, using ImageJ thresholding and 3D object counter (Goel *et al.*, 2017). DA neurons were manually counted through z-stacks using Cell Counter plugin using the anti-TH staining and each hemisphere represents an n number (White *et al.*, 2010).

## **Western blotting**

*Drosophila heads.* Quantitative Western blotting from adult fly heads were performed as previously published protocol (Solomon *et al.*, 2018). The following primary antibodies were used: anti-Synapsin (1:500 – DSHB 3C11), anti-Syntaxin (1:1000 – DSHB 8C3), anti-GFP (1:1000 - Thermo Fischer A6455), anti-beta actin (1:1000 - Abcam Ab8227), anti-beta tubulin (1:1000 – DSHB E3). Secondary antibodies were IRDye 800 conjugated goat anti-rabbit (1:10000, Rockland Immunochemicals) and Alexa Fluor 680 goat anti-mouse (1:10000, Invitrogen); for details see the Supplementary material.

## **Analysis of neuronal function**

The Steady State Visual Evoked Potential (SSVEP) assay measured the output of the photoreceptors and second-order lamina neurons using protocol described previously (Petridi *et al.*, 2020); for details see the Supplementary material.

## Behavioural Analyses

***Drosophila Arousal Tracking (DART) System.*** DART was used to perform single fly tracking of age-matched mated females using protocol described previously (Faville *et al.*, 2015; Shaw *et al.*, 2018); for details see the Supplementary material.

***Startle-induced negative geotaxis (SING).*** SING was used to assess the locomotor ability of flies following a startle stimulus to which flies display a negative geotaxis response (modified from Ruan *et al.*, 2015). A group of ten mated age-matched female flies, per genotype, were transferred into the experimental tubes. After the tubes of all genotypes tested being placed in custom-made apparatus (see Fig. 7A), flies were allowed to acclimatise for 20 min. Control and experimental groups were always assayed together by tapping all the flies to the bottom of the tubes and allowing them to climb as a negative geotaxis response. After 10 seconds, the number of flies that successfully climbed above the 7 cm line was recorded. This assay was repeated 5 times allowing 1 min rest during between trials; for details see the Supplementary material.

***Proboscis extension response (PER) – Akinesia assay.*** The PER assay was performed as protocol described previously (Petriddi *et al.*, 2020); for details see the Supplementary material.

## Human post-mortem tissue analysis

***Brain tissue samples.*** Detailed description of brain samples, diagnose criteria and neuropathological assessments has been previously published (Berezki *et al.*, 2018). Brain tissue samples were provided from Brains for dementia research network. Consent for autopsy, neuropathological assessment and research were obtained and all studies were

carried out under the ethical approval of the regional Ethical Review Board of Stockholm (2012/910-31/4). 30 cases in total/brain regions were used for the western blot experiments. Controls were defined as subjects with no clinical history and no neuropathological evidence of a neurodegenerative condition.

**Quantitative Western Blotting.** For western blot analysis, 500 mg of frozen tissue was homogenized in ice-cold buffer containing 50 mM Tris-HCL, 5 mM EGTA, 10 mM EDTA, protease inhibitor cocktail tablets and 2 mg/mL pepstatin A dissolved in ethanol:dimethyl sulfoxide 2:1 (Sigma). To minimize inter-blot variability, 20 µg total protein/samples were loaded in each lane of each gel on 7.5-10% SDS-polyacrylamide gel and then transferred to nitrocellulose membrane (Immobilon-P, Millipore). After blocking, membranes were incubated with primary antibodies followed by HRP conjugated secondary antibody. The following primary antibodies were used: rabbit polyclonal anti-LIPRIN-α3 (1:1000, Synaptic Systems 169 102); Rabbit anti-LIPRIN-α4 (1:1000, Abcam - ab136305); Rabbit anti-GAPDH (1:5000, Abcam, ab22555). Secondary antibodies used were: donkey anti-rabbit (1:10000, Invitrogen NA9340V) or donkey anti-rabbit (1:5000, LICOR, 926-32213); for details see the Supplementary material.

### Statistical analysis

GraphPad Prism 8 was used to perform the statistical analyses. Comparison of means were performed using either t-test; one-way ANOVA or Kruskal-Wallis test followed by Dunnett's, Tukey's or Dunn's multiple comparison post-hoc tests. The significance was defined as  $p < 0.05$ , error bars are shown as SEM. For complete description, please see the Supplementary material.



## **Data availability**

The data supporting the findings of this study are available within the article and in the supplementary material.

## **Acknowledgements**

We thank R. Faville for help with the DART system; H. Bellen, S. Sweeney and D. Deitcher for antibodies; the Bloomington stocks centre for flies; V. B. Pedrozo for the design and production of the custom-made SING apparatus; and to W. H. Au for helpful discussions and technical assistance. This work was supported by a PhD fellowship from CAPES Foundation–Ministry of Education of Brazil to JCB (BEX 13162/13-6); funding from Demensfonden, Magnus Bergwalls Stiftelse, Stohnes Stiftelse, Gamla Tjänarinnor to EB; funding from La Caixa Foundation (HR17-00595) to PMD and by the UK Medical Research Council (G0701498; MR/L010666/1) and the UK Biotechnology and Biological Sciences Research Council (BB/N001230/1) to FH.

## **Conflict of interest statement**

B.K. is co-founder of BFKLab LTD. The remaining authors declare no competing interest.

## References

- Afsari F, Christensen K V., Smith GP, Hentzer M, Nippe OM, Elliott CJH, et al. Abnormal visual gain control in a Parkinson's disease model. *Hum Mol Genet* 2014; 23: 4465–4478.
- Auluck PK, Chan HYE, Trojanowski JQ, Lee VMY, Bonini NM. Chaperone suppression of alpha-synuclein toxicity in a Drosophila model for Parkinson's disease. *Science* 2002; 295: 865–8.
- Bendor JT, Logan TP, Edwards RH. The function of  $\alpha$ -synuclein. *Neuron* 2013; 79: 1044–1066.
- Bereczki E, Branca RM, Francis PT, Pereira JB, Baek J-H, Hortobágyi T, et al. Synaptic markers of cognitive decline in neurodegenerative diseases: a proteomic approach. *Brain* 2018; 141: 582–595.
- Bereczki E, Francis PT, Howlett D, Pereira JB, Höglund K, Bogstedt A, et al. Synaptic proteins predict cognitive decline in Alzheimer's disease and Lewy body dementia. *Alzheimer's Dement* 2016; 12: 1149–1158.
- Braak H, Sandmann-Keil D, Gai W, Braak E. Extensive axonal Lewy neurites in Parkinson's disease: A novel pathological feature revealed by alpha-synuclein immunocytochemistry. *Neurosci Lett* 1999; 265: 67–69.
- Braak H, Del Tredici K, Bratzke H, Hamm-Clement J, Sandmann-Keil D, Rüb U. Staging of the intracerebral inclusion body pathology associated with idiopathic Parkinson's disease (preclinical and clinical stages). *J Neurol* 2002; 249 Suppl: III/1-5.
- Brent JR, Werner KM, McCabe BD. Drosophila Larval NMJ Dissection. *J Vis Exp* 2009: 4–5.
- Bridi JC, Hirth F. Mechanisms of  $\alpha$ -Synuclein Induced Synaptopathy in Parkinson's Disease. *Front Neurosci* 2018; 12: 80.
- Burgoyne RD, Morgan A. Cysteine string protein (CSP) and its role in preventing neurodegeneration. *Semin Cell Dev Biol* 2015; 40: 153–159.
- Burke RE, O'Malley K. Axon degeneration in Parkinson's disease. *Exp Neurol* 2013; 246:

636 72–83.

637 Burré J, Sharma M, Tsetsenis T, Buchman V, Etherton MR, Südhof TC. Alpha-synuclein  
638 promotes SNARE-complex assembly in vivo and in vitro. *Science* 2010; 329: 1663–7.

639 Calcagno B, Eyles D, van Alphen B, van Swinderen B. Transient activation of dopaminergic  
640 neurons during development modulates visual responsiveness, locomotion and brain activity  
641 in a dopamine ontogeny model of schizophrenia. *Transl Psychiatry* 2013; 3: e2026-10.

642 Calo L, Wegrzynowicz M, Santivañez-Perez J, Grazia Spillantini M. Synaptic failure and  $\alpha$ -  
643 synuclein. *Mov Disord* 2016; 31: 169–177.

644 Caminiti SP, Presotto L, Baroncini D, Garibotto V, Moresco RM, Gianolli L, et al. Axonal  
645 damage and loss of connectivity in nigrostriatal and mesolimbic dopamine pathways in early  
646 Parkinson’s disease. *NeuroImage Clin* 2017; 14: 734–740.

647 Cheng HC, Ulane CM, Burke RE. Clinical progression in Parkinson disease and the  
648 neurobiology of axons. *Ann Neurol* 2010; 67: 715–725.

649 Choi M-G, Kim MJ, Kim D-G, Yu R, Jang Y-N, Oh W-J. Sequestration of synaptic proteins  
650 by alpha-synuclein aggregates leading to neurotoxicity is inhibited by small peptide. *PLoS*  
651 *One* 2018; 13: e0195339.

652 Colom-Cadena M, Pegueroles J, Herrmann AG, Henstridge CM, Muñoz L, Querol-Vilaseca  
653 M, et al. Synaptic phosphorylated  $\alpha$ -synuclein in dementia with Lewy bodies. *Brain* 2017;  
654 140: 3204–3214.

655 Cording AC, Shiaelis N, Petridi S, Middleton CA, Wilson LG, Elliott CJH. Targeted kinase  
656 inhibition relieves slowness and tremor in a *Drosophila* model of LRRK2 Parkinson’s  
657 disease. *npj Park Dis* 2017; 3: 34.

658 Cunningham PC, Waldeck K, Ganetzky B, Babcock DT. Neurodegeneration and locomotor  
659 dysfunction in *Drosophila* scarlet mutants. *J Cell Sci* 2018; 131: jcs216697.

660 Dauer W, Przedborski S. Parkinson’s disease: Mechanisms and models. *Neuron* 2003; 39:  
661 889–909.

662 Diaper DC, Adachi Y, Lazarou L, Greenstein M, Simoes FA, Di Domenico A, et al.

663 *Drosophila* TDP-43 dysfunction in glia and muscle cells cause cytological and behavioural  
664 phenotypes that characterize ALS and FTLN. *Hum Mol Genet* 2013; 22: 3883–93.

665 Dijkstra A a., Ingrassia A, de Menezes RX, van Kesteren RE, Rozemuller AJM, Heutink P, et  
666 al. Evidence for Immune Response, Axonal Dysfunction and Reduced Endocytosis in the  
667 Substantia Nigra in Early Stage Parkinson’s Disease. *PLoS One* 2015; 10: e0128651.

668 Faville R, Kottler B, Goodhill GJ, Shaw PJ, van Swinderen B. How deeply does your mutant  
669 sleep? Probing arousal to better understand sleep defects in *Drosophila*. *Sci Rep* 2015; 5:  
670 8454.

671 Feany MB, Bender WW. A *Drosophila* model of Parkinson’s disease. *Nature* 2000; 404:  
672 394–8.

673 Fernández-Chacón R, Wölfel M, Nishimune H, Tabares L, Schmitz F, Castellano-Muñoz M,  
674 et al. The synaptic vesicle protein CSP $\alpha$  prevents presynaptic degeneration. *Neuron* 2004; 42:  
675 237–251.

676 Ferreira M, Massano J. An updated review of Parkinson’s disease genetics and  
677 clinicopathological correlations. *Acta Neurol Scand* 2017; 135: 273–284.

678 Friggi-Grelín F, Coulom H, Meller M, Gomez D, Hirsh J, Birman S. Targeted gene  
679 expression in *Drosophila* dopaminergic cells using regulatory sequences from tyrosine  
680 hydroxylase. *J Neurobiol* 2003; 54: 618–627.

681 Gitler D, Takagishi Y, Feng J, Ren Y, Rodriguiz RM, Wetsel WC, et al. Different presynaptic  
682 roles of synapsins at excitatory and inhibitory synapses. *J Neurosci* 2004; 24: 11368–80.

683 Goedert M, Jakes R, Spillantini MG. The Synucleinopathies: Twenty Years on. *J Parkinsons*  
684 *Dis* 2017; 7: S53–S71.

685 Goel P, Dickman D. Distinct homeostatic modulations stabilize reduced postsynaptic  
686 receptivity in response to presynaptic DLK signaling. *Nat Commun* 2018; 9: 1856.

687 Goel P, Li X, Dickman D. Disparate Postsynaptic Induction Mechanisms Ultimately  
688 Converge to Drive the Retrograde Enhancement of Presynaptic Efficacy. *Cell Rep* 2017; 21:  
689 2339–2347.

690 Greengard P, Valtorta F, Czernik A, Benfenati F. Synaptic vesicle phosphoproteins and  
691 regulation of synaptic function. *Science* (80- ) 1993; 259: 780–785.

692 Han J, Pluhackova K, Böckmann RA. The Multifaceted Role of SNARE Proteins in  
693 Membrane Fusion. *Front Physiol* 2017; 8: 5.

694 Hawkes CH, Del Tredici K, Braak H. A timeline for Parkinson’s disease. *Park Relat Disord*  
695 2010; 16: 79–84.

696 Heisenberg M. Separation of receptor and lamina potentials in the electroretinogram of  
697 normal and mutant *Drosophila*. *J Exp Biol* 1971; 55: 85–100.

698 Hindle S, Afsari F, Stark M, Adam Middleton C, Evans GJO, Sweeney ST, et al.  
699 Dopaminergic expression of the Parkinsonian gene LRRK2-G2019S leads to non-  
700 autonomous visual neurodegeneration, accelerated by increased neural demands for energy.  
701 *Hum Mol Genet* 2013; 22: 2129–2140.

702 Hornykiewicz O. Biochemical aspects of Parkinson’s disease. *Neurology* 1998; 51: S2-9.

703 Humphrey DM, Parsons RB, Ludlow ZN, Riemsperger T, Esposito G, Verstreken P, et al.  
704 Alternative oxidase rescues mitochondria-mediated dopaminergic cell loss in *Drosophila*.  
705 *Hum Mol Genet* 2012; 21: 2698–2712.

706 Kalia L V, Lang AE. Parkinson’s disease. *Lancet* 2015; 6736: 1–17.

707 Kittel RJ, Wichmann C, Rasse TM, Fouquet W, Schmidt M, Schmid A, et al. Bruchpilot  
708 promotes active zone assembly, Ca<sup>2+</sup> channel clustering, and vesicle release. *Science* 2006;  
709 312: 1051–4.

710 Klein C, Westenberger A. Genetics of Parkinson’s disease. *Cold Spring Harb Perspect Med*  
711 2012; 2: a008888.

712 Kouroupi G, Taoufik E, Vlachos IS, Tsioras K, Antoniou N, Papastefanaki F, et al. Defective  
713 synaptic connectivity and axonal neuropathology in a human iPSC-based model of familial  
714 Parkinson’s disease. *Proc Natl Acad Sci* 2017; 114: E3679–E3688.

715 Kramer ML, Schulz-Schaeffer WJ. Presynaptic alpha-synuclein aggregates, not Lewy bodies,  
716 cause neurodegeneration in dementia with Lewy bodies. *J Neurosci* 2007; 27: 1405–10.

717 Lang AE, Lozano AM. Parkinson's Disease - First of two parts. N Engl J Med 1998; 339:  
718 1044–1053.

719 Lang AE, Lozano AM. Parkinson's Disease - Second of two parts. N Engl J Med 1998; 339:  
720 1130–1143.

721 Lashuel H a, Overk CR, Oueslati A, Masliah E. The many faces of  $\alpha$ -synuclein: from  
722 structure and toxicity to therapeutic target. Nat Rev Neurosci 2013; 14: 38–48.

723 Lim Y, Kehm VM, Lee EB, Soper JH, Li C, Trojanowski JQ, et al.  $\alpha$ -syn suppression  
724 reverses synaptic and memory defects in a mouse model of dementia with lewy bodies. J  
725 Neurosci 2011; 31: 10076–10087.

726 Mahlknecht P, Seppi K, Poewe W. The concept of prodromal Parkinson's disease. J  
727 Parkinsons Dis 2015; 5: 681–697.

728 Mahul-Mellier AL, Burtscher J, Maharjan N, Weerens L, Croisier M, Kuttler F, et al. The  
729 process of Lewy body formation, rather than simply  $\alpha$ -synuclein fibrillization, is one of the  
730 major drivers of neurodegeneration. Proc Natl Acad Sci U S A 2020; 117: 4971–4982.

731 Marella S, Mann K, Scott K. Dopaminergic Modulation of Sucrose Acceptance Behavior in  
732 Drosophila. Neuron 2012; 73: 941–950.

733 Marrocco E, Indrieri A, Esposito F, Tarallo V, Carboncino A, Alvino FG, et al.  $\alpha$ -synuclein  
734 overexpression in the retina leads to vision impairment and degeneration of dopaminergic  
735 amacrine cells. Sci Rep 2020; 10: 9619.

736 Mazzoni P, Shabbott B, Cortés JC. Motor control abnormalities in Parkinson's disease. Cold  
737 Spring Harb Perspect Med 2012; 2: 1–17.

738 Menon KP, Carrillo RA, Zinn K. Development and plasticity of the Drosophila larval  
739 neuromuscular junction. Wiley Interdiscip Rev Dev Biol 2013; 2: 647–70.

740 Miquel J, Lundgren PR, Binnard R. Negative geotaxis and mating behavior in control and  
741 gamma-irradiated. Drosoph Informmation Serv 1972; 48: 48–60.

742 Mochizuki H, Choong CJ, Masliah E. A refined concept:  $\alpha$ -synuclein dysregulation disease.  
743 Neurochem Int 2018; 119: 84–96.

744 Nippe OM, Wade AR, Elliott CJH, Chawla S. Circadian Rhythms in Visual Responsiveness  
745 in the Behaviorally Arrhythmic *Drosophila* Clock Mutant Clk<sup>Jrk</sup>. *J Biol Rhythms* 2017; 32:  
746 583–592.

747 Ohyama T, Verstreken P, Ly C V., Rosenmund T, Rajan A, Tien A-C, et al. Huntingtin-  
748 interacting protein 14, a palmitoyl transferase required for exocytosis and targeting of CSP to  
749 synaptic vesicles. *J Cell Biol* 2007; 179: 1481–96.

750 Park J, Lee SB, Lee S, Kim Y, Song S, Kim S, et al. Mitochondrial dysfunction in *Drosophila*  
751 PINK1 mutants is complemented by parkin. *Nature* 2006; 441: 1157–1161.

752 Petridi S, Middleton CA, Ugboode C, Fellgett A, Covill L, Elliott CJH. In Vivo Visual Screen  
753 for Dopaminergic Rab ↔ LRRK2-G2019S Interactions in *Drosophila* Discriminates Rab10  
754 from Rab3. *Genes|Genomes|Genetics* 2020; 10: 1903–1914.

755 Poças GM, Branco-Santos J, Herrera F, Outeiro TF, Domingos PM. Alpha-Synuclein  
756 modifies mutant huntingtin aggregation and neurotoxicity in *Drosophila*. *Hum Mol Genet*  
757 2015; 24: 1898–1907.

758 Rao SS, Stewart BA, Rivlin PK, Vilinsky I, Watson BO, Lang C, et al. Two distinct effects  
759 on neurotransmission in a temperature-sensitive SNAP-25 mutant. *EMBO J* 2001; 20: 6761–  
760 6771.

761 Riemensperger T, Issa A, Pech U, Coulom H, Nguyễn M-V, Cassar M, et al. A single  
762 dopamine pathway underlies progressive locomotor deficits in a *Drosophila* model of  
763 Parkinson disease. *Cell Rep* 2013; 5: 952–60.

764 Ruan K, Zhu Y, Li C, Brazill JM, Zhai RG. Alternative splicing of *Drosophila* Nmnat  
765 functions as a switch to enhance neuroprotection under stress. *Nat Commun* 2015; 6: 10057.

766 Sakai R, Suzuki M, Ueyama M, Takeuchi T, Minakawa EN, Hayakawa H, et al. E46K  
767 mutant  $\alpha$ -synuclein is more degradation resistant and exhibits greater toxic effects than wild-  
768 type  $\alpha$ -synuclein in *Drosophila* models of Parkinson’s disease. *PLoS One* 2019; 14: 1–16.

769 Satake W, Nakabayashi Y, Mizuta I, Hirota Y, Ito C, Kubo M, et al. Genome-wide  
770 association study identifies common variants at four loci as genetic risk factors for  
771 Parkinson’s disease. *Nat Genet* 2009; 41: 1303–1307.

772 Sharma M, Burré J, Südhof TC. CSP $\alpha$  promotes SNARE-complex assembly by chaperoning  
773 SNAP-25 during synaptic activity. *Nat Cell Biol* 2011; 13: 30–9.

774 Shaw RE, Kottler B, Ludlow ZN, Buhl E, Kim D, Morais da Silva S, et al. In vivo expansion  
775 of functionally integrated GABAergic interneurons by targeted increase in neural progenitors.  
776 *EMBO J* 2018; 33: e98163.

777 Simón-Sánchez J, Schulte C, Bras JM, Sharma M, Gibbs JR, Berg D, et al. Genome-wide  
778 association study reveals genetic risk underlying Parkinson’s disease. *Nat Genet* 2009; 41:  
779 1308–1312.

780 Singleton AB, Farrer M, Johnson J, Singleton A, Hague S, Kachergus J, et al. Alpha-  
781 Synuclein locus triplication causes Parkinson’s disease. *Science* 2003; 302: 841.

782 Solomon DA, Stepto A, Au WH, Adachi Y, Diaper DC, Hall R, et al. A feedback loop  
783 between dipeptide-repeat protein, TDP-43 and karyopherin- $\alpha$  mediates C9orf72-related  
784 neurodegeneration. *Brain* 2018; 141: 2908–2924.

785 Spillantini MG, Schmidt ML, Lee VM-Y, Trojanowski JQ, Jakes R, Goedert M. alpha-  
786 Synuclein in Lewy bodies. *Nature* 1997; 388: 839–840.

787 Südhof TC. The synaptic vesicle cycle. *Annu Rev Neurosci* 2004; 27: 509–547.

788 Südhof TC. The Presynaptic Active Zone. *Neuron* 2012; 75: 11–25.

789 Sun J, Xu AQ, Giraud J, Poppinga H, Riemensperger T, Fiala A, et al. Neural control of  
790 startle-induced locomotion by the mushroom bodies and associated neurons in drosophila.  
791 *Front Syst Neurosci* 2018; 12: 6.

792 Tagliaferro P, Burke RE. Retrograde Axonal Degeneration in Parkinson Disease. *J*  
793 *Parkinsons Dis* 2016; 6: 1–15.

794 Trinh K, Moore K, Wes PD, Muchowski PJ, Dey J, Andrews L, et al. Induction of the phase  
795 II detoxification pathway suppresses neuron loss in *Drosophila* models of Parkinson’s  
796 disease. *J Neurosci* 2008; 28: 465–72.

797 Vaccaro A, Issa A-R, Seugnet L, Birman S, Klarsfeld A. *Drosophila* Clock Is Required in  
798 Brain Pacemaker Neurons to Prevent Premature Locomotor Aging Independently of Its



799 Circadian Function. PLOS Genet 2017; 13: e1006507.

800 Venda LL, Cragg SJ, Buchman VL, Wade-Martins R. Alpha-Synuclein and dopamine at the  
801 crossroads of Parkinson's disease. Trends Neurosci 2010; 33: 559–568.

802 Volpicelli-Daley LA, Luk KC, Patel TP, Tanik SA, Riddle DM, Stieber A, et al. Exogenous  
803  $\alpha$ -Synuclein Fibrils Induce Lewy Body Pathology Leading to Synaptic Dysfunction and  
804 Neuron Death. Neuron 2011; 72: 57–71.

805 Wagh DA, Rasse TM, Asan E, Hofbauer A, Schwenkert I, Dürrebeck H, et al. Bruchpilot, a  
806 protein with homology to ELKS/CAST, is required for structural integrity and function of  
807 synaptic active zones in Drosophila. Neuron 2006; 49: 833–44.

808 Walker Z, Possin KL, Boeve BF, Aarsland D. Lewy body dementias. Lancet 2015; 386:  
809 1683–1697.

810 Wang SSH, Held RG, Wong MY, Liu C, Karakhanyan A, Kaeser PS. Fusion Competent  
811 Synaptic Vesicles Persist upon Active Zone Disruption and Loss of Vesicle Docking. Neuron  
812 2016; 91: 777–791.

813 West RJH, Lu Y, Marie B, Gao FB, Sweeney ST. Rab8, POSH, and TAK1 regulate synaptic  
814 growth in a Drosophila model of frontotemporal dementia. J Cell Biol 2015; 208: 931–947.

815 White KE, Humphrey DM, Hirth F. The dopaminergic system in the aging brain of  
816 Drosophila. Front Neurosci 2010; 4: 205.

817 Whitworth AJ, Theodore DA, Greene JC, Beneš H, Wes PD, Pallanck LJ. Increased  
818 glutathione S-transferase activity rescues dopaminergic neuron loss in a Drosophila model of  
819 Parkinson's disease. Proc Natl Acad Sci U S A 2005; 102: 8024–8029.

820 Wrasidlo W, Tsigelny IF, Price DL, Dutta G, Rockenstein E, Schwarz TC, et al. A de novo  
821 compound targeting  $\alpha$ -synuclein improves deficits in models of Parkinson's disease. Brain  
822 2016

823 Zhai RG, Bellen HJ. The architecture of the active zone in the presynaptic nerve terminal.  
824 Physiology (Bethesda) 2004; 19: 262–70.

825 Zinsmaier KE, Eberle KK, Buchner E, Walter N, Benzer S. Paralysis and early death in

826 cysteine string protein mutants of Drosophila. Science 1994; 263: 977–980.

827 Zinsmaier KE, Hofbauer A, Heimbeck G, Pflugfelder GO, Buchner S, Buchner E. A  
828 cysteine-string protein is expressed in retina and brain of drosophila. J Neurogenet 1990; 7:  
829 15–29.

830 Zürner M, Schoch S. The mouse and human Liprin- $\alpha$  family of scaffolding proteins:  
831 Genomic organization, expression profiling and regulation by alternative splicing. Genomics  
832 2009; 93: 243–253.

833

## 834 Figure and figure legends

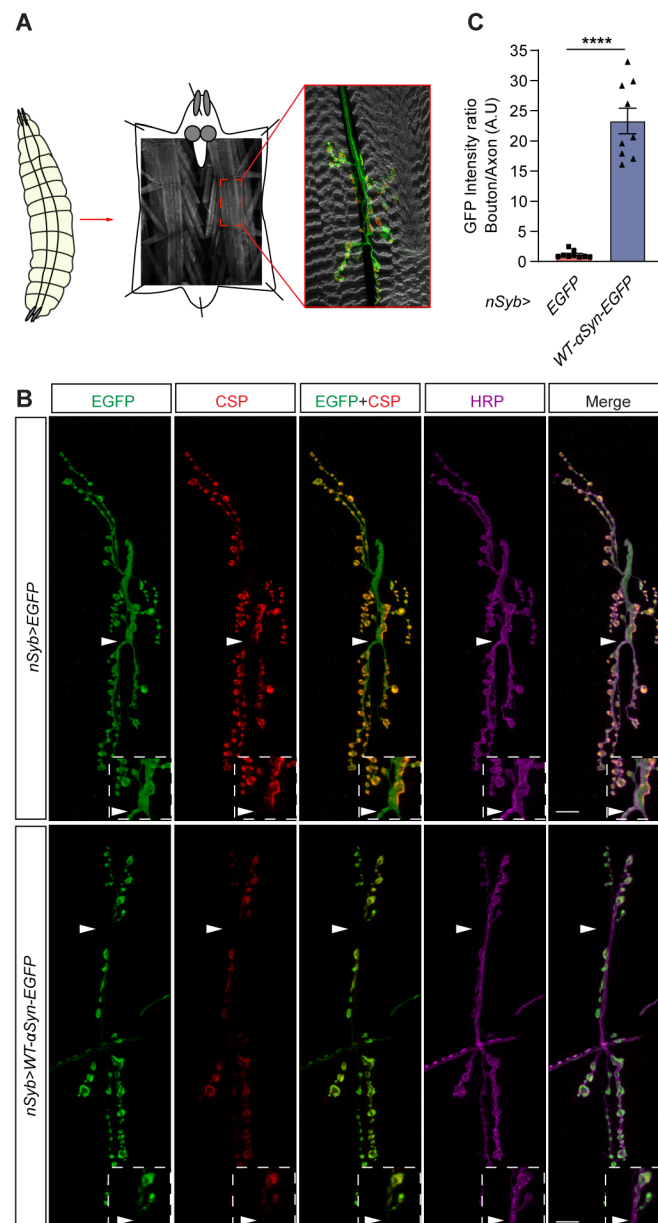

835

836 **Figure 1.  $\alpha$ -syn accumulates in synaptic boutons at the *Drosophila* NMJ.** (A) Third instar  
837 larval stage (L3) *Drosophila* (left) was used to investigate presynaptic terminals (boutons)  
838 terminating at the neuromuscular junction (NMJ, middle). Immunohistochemistry assay  
839 reveals the muscle fibres (grey) stained with phalloidin that binds to actin; the axons  
840 descending from the motor neuron and terminating onto the muscles are labelled with anti-  
841 horseradish peroxidase (HRP – grey); and the presynaptic terminal of the motor neuron  
842 labelled with anti-BRP (red). (B) Representative image of NMJ of *nSyb>EGFP* and

*nSyb>WT-α-syn-EGFP* larvae immunostained with anti-GFP (green), anti-CSP (red) and anti-HRP (magenta). Arrowheads indicate accumulation of WT-α-syn-EGFP in synaptic boutons, which are immunolabelled with anti-CSP while control EGFP is homogeneously expressed in synaptic boutons and axonal regions devoid of CSP immunoreactivity; dashed boxes show a higher magnification of the areas indicated by the arrowheads (C) Quantitative analysis of the ratio of GFP fluorescence intensity between boutons and axons; \*\*\*\*p=0.0001; mean ± SEM shown for each genotype (n = 9 NMJs/genotype). Statistical analyses were performed using unpaired two-tailed t-test. Scale bars: 10 μm.

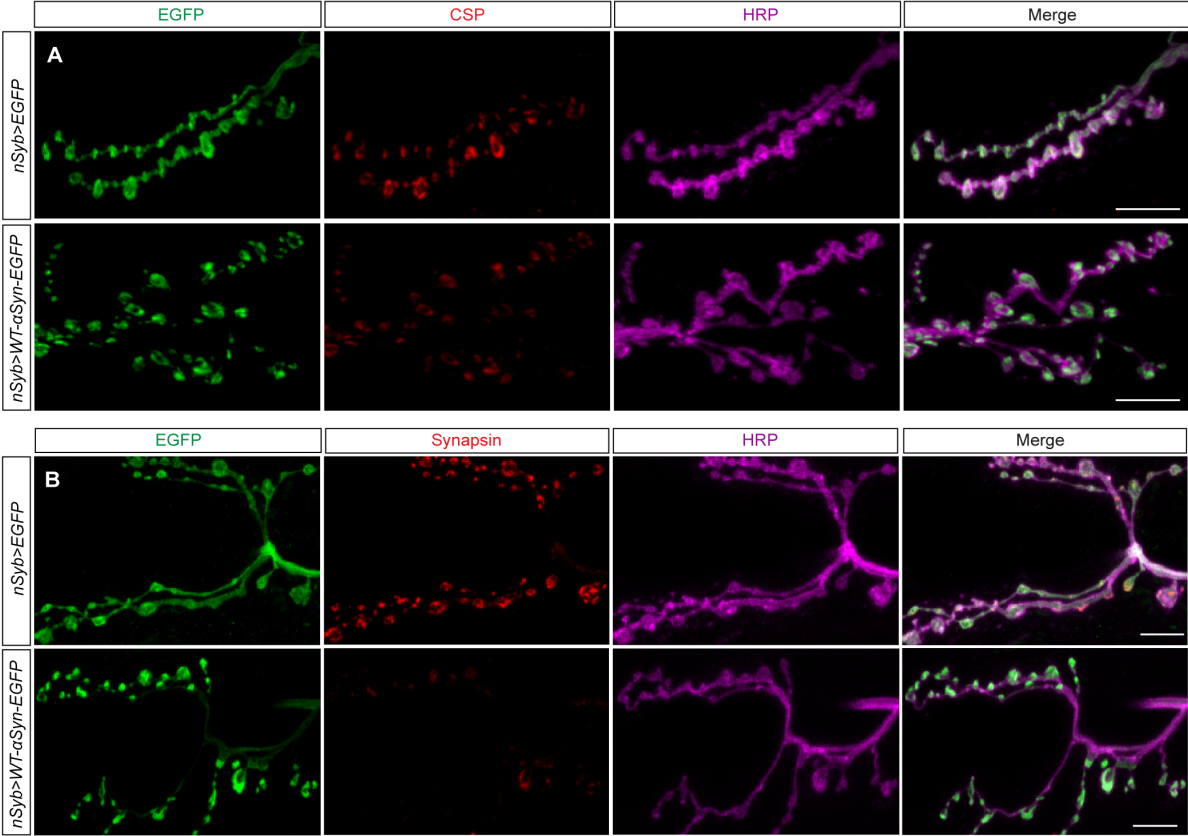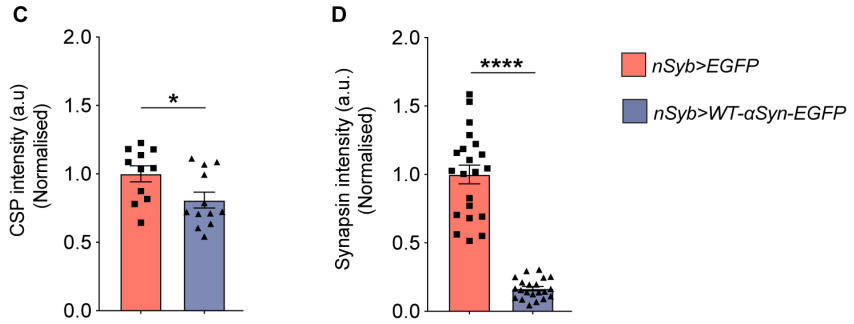

**Figure 2. Accumulating  $\alpha$ -syn downregulates presynaptic proteins.** (A) Confocal images of NMJ immunolabeled with anti-CSP, anti-GFP and anti-HRP. (B) Confocal images of NMJ staining with anti-Synapsin, anti-GFP and anti-HRP. (C) Quantitative analysis of the fluorescence levels of CSP revealed downregulation in the NMJ of *nSyb>WT- $\alpha$ -syn-EGFP* larvae compared to control; \* $p=0.0297$ ; mean  $\pm$  SEM shown for each genotype ( $n=11$  NMJs/genotype). (D) Quantitative analysis of the Synapsin fluorescence levels showed downregulation in the NMJ of *nSyb>WT- $\alpha$ -syn-EGFP* larvae compared to control; \*\*\*\* $p<0.0001$ ; mean with SEM shown for each genotype ( $n=21$  NMJs/genotype). Statistical analyses were performed using unpaired two-tailed t-test. Scale bars: 10  $\mu$ m

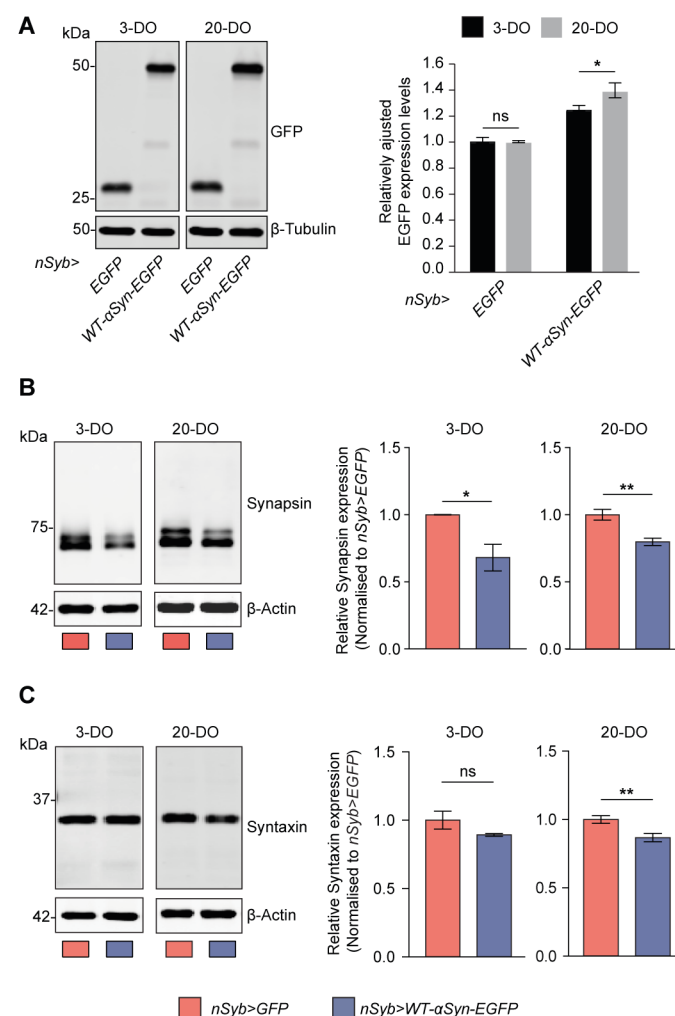

**Figure 3. Progressive accumulation of  $\alpha$ -syn affects presynaptic proteins in ageing animals.** (A) Expression levels of WT- $\alpha$ -syn-EGFP expressed under the control of pan-neuronal driver *nSyb-Gal4* increased at 20 days of age compared to the levels observed in fly brains at 3 days of age; \* $p=0.0411$ , ns – not significant  $p>0.05$ ,  $n=7-9$ . Such accumulation was specific for WT- $\alpha$ -syn-EGFP since the control flies expressing EGFP only showed no alteration in the expression levels of EGFP. (B) The expression levels of the synaptic vesicle protein Synapsin were reduced in flies expressing WT- $\alpha$ -syn-EGFP at day 3 and 20 compared to control flies; \* $p=0.03$  and \*\* $p=0.002$ ,  $n=3-6$ . (C) The expression levels of Syntaxin, a protein of the presynaptic SNARE complex, also had its levels reduced at day 20 in fly brain expressing WT- $\alpha$ -syn-EGFP compared to control; \*\* $p=0.0093$ , ns – not significant  $p>0.05$ ,  $n=3-6$ . Mean  $\pm$  SEM are shown, statistical analyses were performed using unpaired two-tailed t-test.

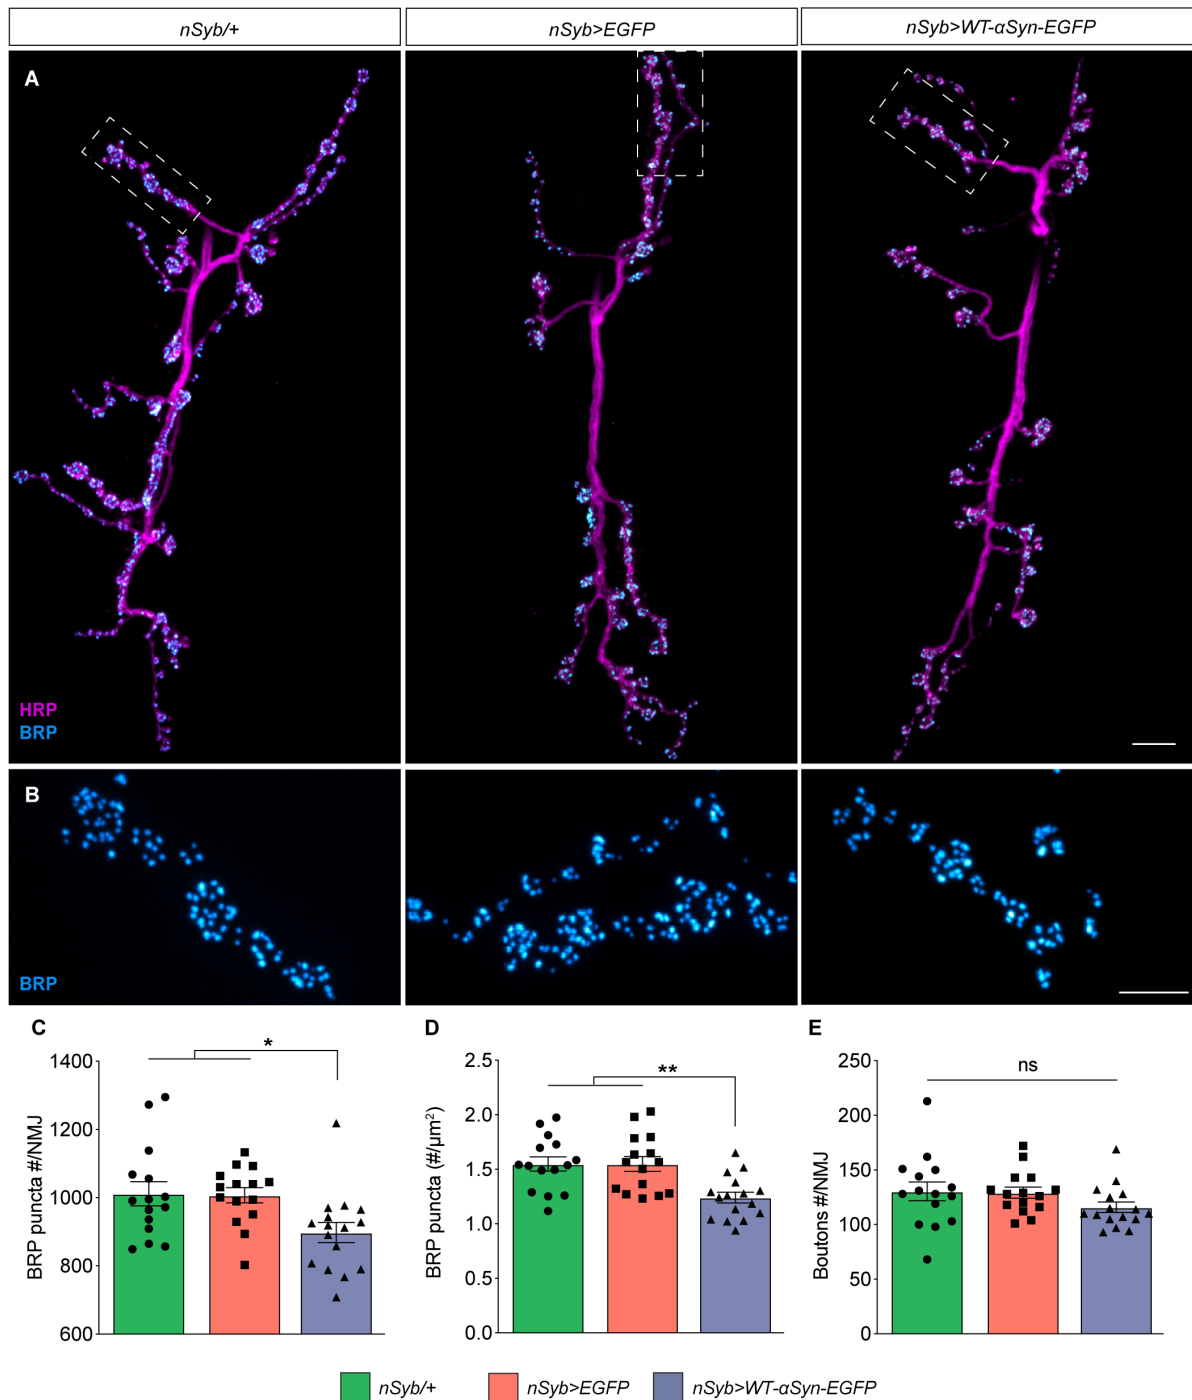

**Figure 4. Presynaptic active zones are reduced by accumulating  $\alpha$ -syn.** (A) Confocal images of NMJ, immunolabeled with anti-nc82/BRP and anti-HRP. (B) Dashed box represents the section of the NMJ (A) imaged with instant super resolution structured illumination microscopy (iSIM) (C) Quantitative analysis of total number of BRP puncta that represents the AZs labelled with anti-nc82/BRP per NMJ; \*p= 0.0245 compared to *nSyb/+* and \*p= 0.0317 compared to *nSyb>EGFP*. (D) Number of BRP puncta normalised by the

883 synaptic surface  $\mu\text{m}^2$  immunolabelled with anti-HRP;  $**p=0.0023$ . (E) The total number of  
 884 synaptic boutons/NMJ was unchanged. All graphs are represented as mean  $\pm$  SEM shown for  
 885 each genotype. (n=15-16 NMJs/genotype). Statistical analyses were performed using one-  
 886 way ANOVA test followed by Tukey's multiple comparison post-hoc test. Scale bars: (A) 10  
 887  $\mu\text{m}$  and (B) 5  $\mu\text{m}$ .  
 888

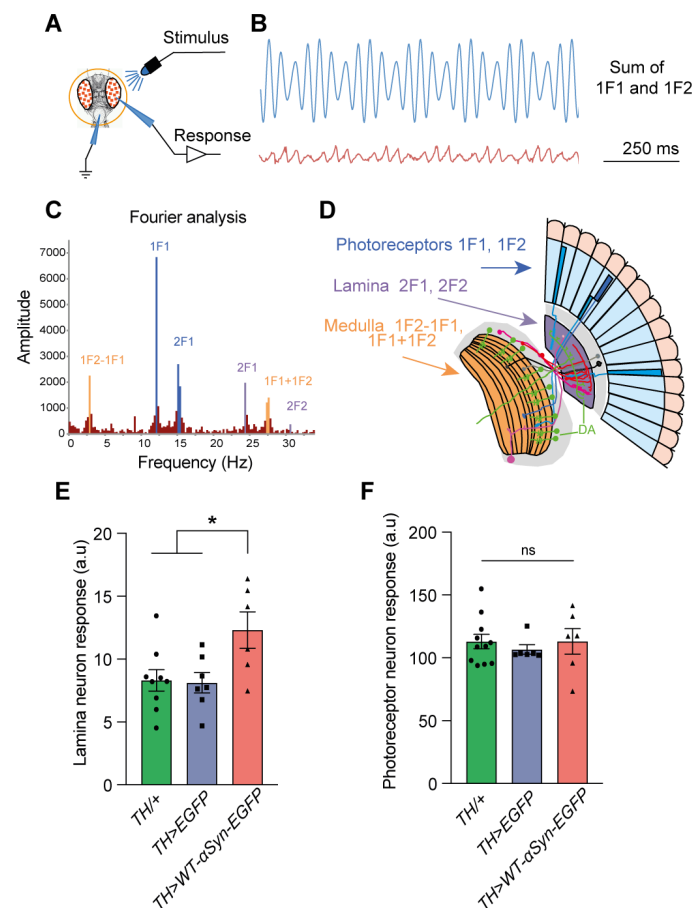

889  
 890 **Figure 5.  $\alpha$ -syn accumulation in dopaminergic neurons impairs visual response.** (A)  
 891 Steady-state visual evoked potential (SSVEP) was measured in flies raised in the dark and  
 892 restrained in a Gilson pippete tip. The recording electrode was placed on the surface of the  
 893 eye, with a reference electrode in the mouthparts. A full field blue light stimulus is provided  
 894 from an LED. A pattern of 45 stimuli are provided, with different amounts of the 1F1 (12Hz)  
 895 and 2F1 (15Hz) stimuli. (B) An example stimulus made up of 70% contrast at 1F1, and 30%



contrast at 2F1 and its response. (C) The response (in B) is analysed by the FFT (Fast-Fourier Transform), revealing that the visual system responds to the supplied frequencies (1F1, 2F1) but also to their multiples (2F1, 2F2) and to the sums and differences (1F1+1F2; 1F2-1F1). Higher frequency harmonics are also seen, notably 2F1+2F2. (D) Genetic dissection (Afsari *et al.*, 2014; Nippe *et al.*, 2017) shows that the majority of the 1F1 and 1F2 components come from the photoreceptors, the 2F1 and 2F2 come from the lamina neurons, and the 1F1+1F2, 1F1+1F2 and 1F2-1F1 from the medulla. (A-D) Modified after Afsari *et al.*, 2014 and Petridi *et al.*, 2020. (E) Flies expressing WT- $\alpha$ -Syn-EGFP under control of *TH-Gal4* driver demonstrated a higher lamina neuron activity in the SSVEP, which is known to negatively correlate with levels of dopamine in the brain; \*p= 0.03. (F) Photoreceptors of *TH>WT- $\alpha$ -Syn-EGFP* displayed no alteration in their response compared to control groups; ns – not significant p>0.05, n=6-11 flies/genotype. Mean  $\pm$  SEM are shown, statistical analyses were performed using one-way ANOVA with Tukey's multiple comparison post-hoc test.

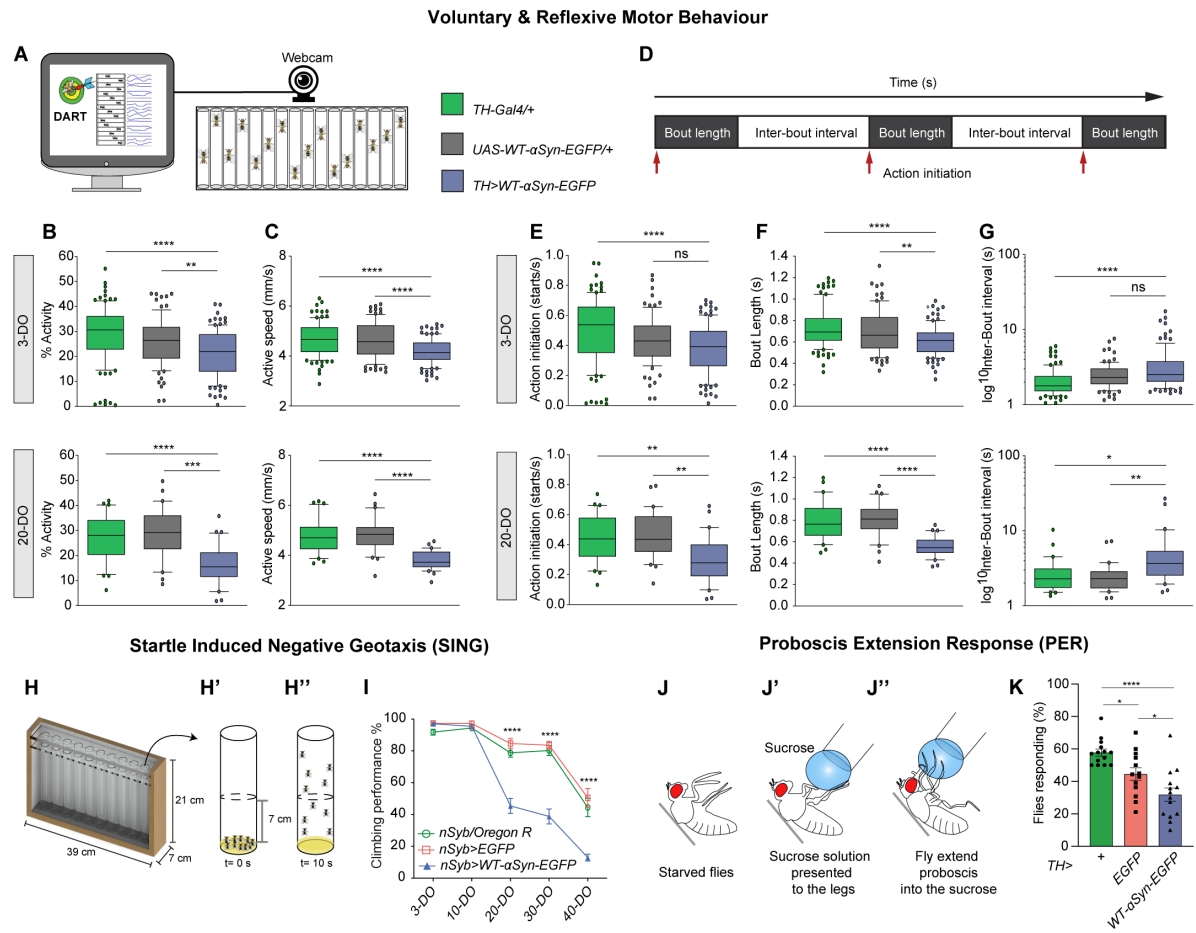

**Figure 6. Synaptopathy induced by  $\alpha$ -syn accumulation causes progressive motor impairment and akinetic behaviour prior to age-related dopaminergic neurodegeneration.** (A) The *Drosophila* Arousal Tracking System (DART) was used to measure spontaneous activity of individual flies that were continuously recorded at 5 frames per second for 2 hours, as set by the DART software using a USB-webcam. (B) Top: spontaneous activity is reduced in 3-day-old flies (3-DO) expressing WT- $\alpha$ -syn-EGFP compared to controls; \*\*\*\* $p$ <0.0001, \*\* $p$ = 0.0071 ( $n$ =90-100 flies/genotype). Bottom: spontaneous activity is further reduced in 20-day-old (20-DO) *TH*>WT- $\alpha$ -syn-EGFP when compared to controls; \*\*\*\* $p$ <0.0001 and \*\*\* $p$ = 0.0002 ( $n$ =30 flies/genotype). (C) Active speed of 3-day-old flies (3-DO) (top) and 20-day-old flies (20-DO) (top) is impaired by WT- $\alpha$ -syn-EGFP expression; \*\*\*\* $p$ <0.0001. (D) Schematic of the activity metrics units. The initiation of a locomotor action (red arrows) is called action initiation. Bout length is the

length of a motor action (dark grey boxes); and the pause between the end and beginning of a new motor action is called inter-bout interval (white boxes). (E) Top: The number of locomotor actions initiated by 3-day-old (3-DO) *TH>WT-α-syn-EGFP* flies was reduced compared to the control group *TH/+*; \*\*\*\* $p<0.0001$  and ns – not significant. Bottom: the locomotor actions initiated by 20-day-old (20-DO) *TH>WT-α-syn-EGFP* flies was reduced when compared to both controls; \*\* $p<0.0011$  compared to *TH/+* and \*\* $p=0.0097$  compared to *WT-α-syn-EGFP/+* control. (F) The length of each bout of activity was shorter in *TH>WT-α-syn-EGFP* flies at 3 (top) and 20 (bottom) days of age, depicting their impaired ability of sustaining a locomotor action; \*\* $p=0.0053$ ; \*\*\*\* $p<0.0001$ . (G) The length between each bout of activity was longer in flies expressing *WT-α-syn-EGFP* at 3 (top) and 20 (bottom) days; \* $p=0.0108$ , \*\* $p<0.0014$ , \*\*\*\* $p<0.0001$ . Box-and-whisker plots represent the median (horizontal line), 25% and 75% quartiles (box), and 5% and 95% quartiles (whiskers); statistical analyses were performed using Kruskal-Wallis test with Dunn's multiple comparison post-hoc test. (H) Custom-made apparatus used to perform startle induced negative geotaxis (SING) assay which allows all fly genotypes to be probed under equal conditions simultaneously. (H') A group of ten flies were placed in an assay tube containing 1 cm of fresh media and then allocated back in the fly holder. Next, the holder was gently tapped allowing all the flies to reach the bottom of the tubes ( $t=0$  seconds). (H'') After 10 seconds, the number of flies that successfully climbed above the 7cm line is recorded. (I) Cohorts of flies were analysed at 3, 10, 20, 30 and 40 days of age. The analysis showed an age-related deficiency in their climbing performance which was further enhanced by the overexpression of *WT-α-syn-EGFP*; \*\*\*\* $p<0.0001$ ; mean  $\pm$  SEM are shown,  $n=9-13$  groups of 10 flies. (J-J'') Proboscis extension response assay evaluated the ability of flies to respond to sucrose offer after starvation. (J) Flies were fixed in a card (grey bar) with rubber cement and were left to recover for 3 hours. (J') Starved flies were presented with a droplet of 100

mM of sucrose to the legs and then immediately scored; (J'') flies that extended or not their proboscis in response to sucrose were scored. (K) Young flies (5-8-day-old) expressing WT- $\alpha$ -syn-EGFP under control of *TH-Gal4* driver showed a reduced response to sucrose compared to controls flies, resembling an akinetic behaviour; \* $p=0.03$  and \*\*\*\* $p<0.0001$ ; mean  $\pm$  SEM shown for each genotype ( $n=13-14$  flies/genotype).

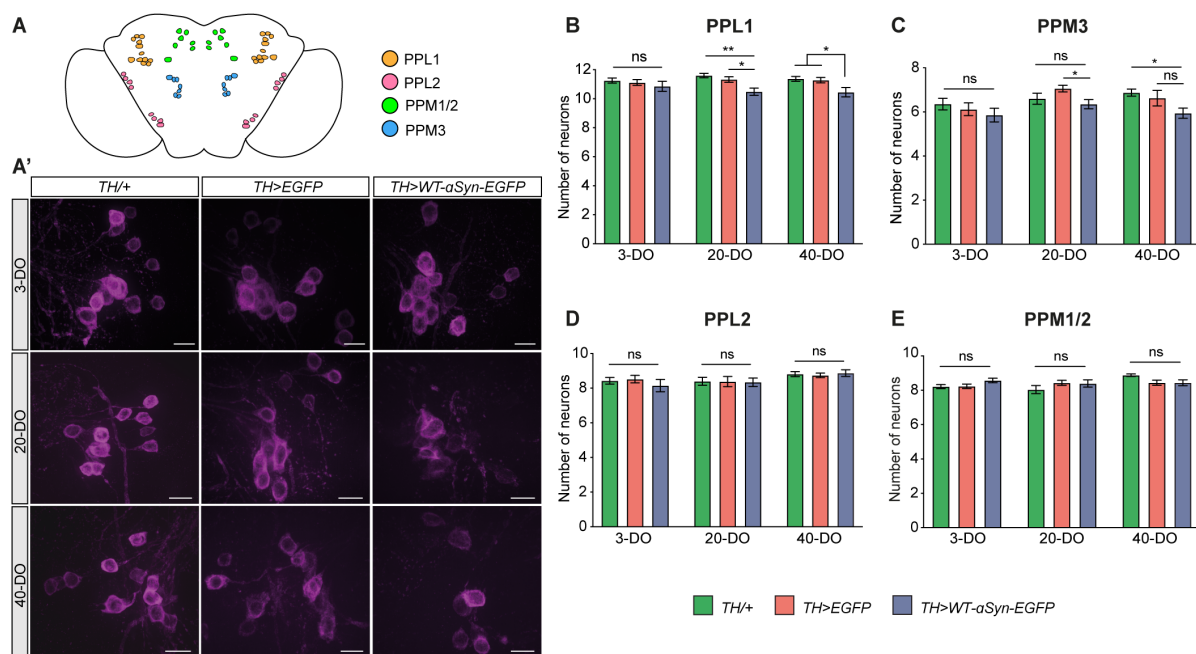

**Figure 7.  $\alpha$ -syn mediated synaptopathy causes progressive and age-related dopaminergic neurodegeneration.** (A) Schematic depiction of dopaminergic (DA) neuron clusters in the adult *Drosophila* brain; paired posterior lateral 1 and 2 (PPL1 and PPL2), the paired posterior medial 1 and 2 (PPM1/2) and paired posterior medial 3 (PPM3). (A') Representative iSIM images from DA neurons from PPL1 clusters immunolabelled with anti-TH antibody. (B) Number of DA neurons per hemisphere from the PPL1 cluster is reduced at day 20 and 40 compared to controls; \*\* $p=0.0016$ , \* $p=0.0146$  for day 20; \* $p=0.0207$  compared to *TH/+*; \* $p=0.0425$  compared to *WT- $\alpha$ -syn-EGFP/+* for day 40. (C) PPM3 clusters displayed a discrete loss of DA neurons in *TH>WT- $\alpha$ -syn-EGFP* flies only when compared to *TH>EGFP* at day 20 (\* $p=0.0292$ ) and to *TH/+* at day 40

(\*p=0.0333). (D-E) DA neurons from PPL2 and PPM1/2 clusters were not affected by the expression of  $\alpha$ -syn; n= 22-38 hemispheres/genotype; ns- not significant p>0.05. Mean  $\pm$  SEM shown, statistical analyses were performed using one-way ANOVA with Tukey's multiple comparison post-hoc test. Scale bar = 10  $\mu$ m.

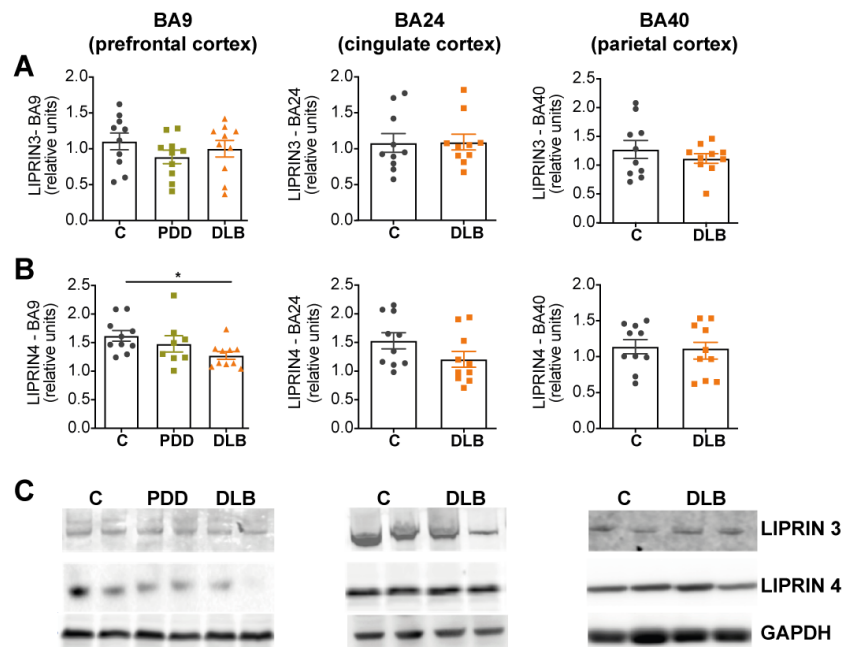

**Figure 8. Active zone protein is affected in human synucleinopathy.** (A-B) Quantitative western blots revealed no significant alteration in the expression levels of LIPRIN- $\alpha$ 3 in the prefrontal cortex (BA9), cingulate cortex (BA24) and parietal cortex (BA40), while LIPRIN- $\alpha$ 4 (B) was found to be downregulated in prefrontal cortex of DLB patients \*p= 0.0389; (n=8-10) (C) Representative images from the western blotting membranes. All graphs are represented as mean  $\pm$  SEM shown. Statistical analyses were performed using one-way ANOVA test followed by post-hoc Dunnett's multiple comparison test.
